# Supplementary material for: Characteristics Associated with Relationship-Centred and Task-Focused Mealtime Practices in Older Adult Care Settings
Source: Atypon-hosted journal article supplement (doi:10.3148/cjdpr-2023-023), 2024-04-04
Supplement: cjdpr-2023-023suppla.pdf [file cjdpr-2023-023suppla.pdf]

## Supplementary Material 1: Relationship- and Task-Focused Mealtime Care Practices

Respondents were asked to check off all practices that **typically** occurred in their care home's dining room(s) **before the COVID-19 pandemic**. Each practice is labelled as being relationship-centred care (RCC) or a task-focused (TF) care practice, however, this labelling was not disclosed to respondents. These practices are a subset of the construct valid and reliable Mealtime Relational Care Checklist. In total, there are 11 task-focused and 15 relationship-centred care practices.

1. Residents had assigned seating (TF)
2. Food Services/team members decide who sat with whom at tables (TF)
3. Clothing protectors were automatically put on all residents (TF)
4. Medications were provided during meal service (TF)
5. Team members ensured residents were well-positioned before assisting to eat (RCC)
6. Residents were addressed using their preferred names (RCC)
7. Team members encouraged residents to participate in mealtime tasks (RCC)
8. Cold beverages were pre-poured before residents came to the table (TF)
9. Residents were asked their beverage preferences at each meal (RCC)
10. Residents ordered their food ahead of the meal (TF)
11. Residents were asked their meal choice at the tableside (RCC)
12. Non-verbal residents were asked meal preferences with display or 'show' plates (RCC)
13. All residents at a table were asked their preferences at the same time (RCC)
14. Team members were encouraged to socialize with residents during meal service (RCC)
15. Physician, nurse or therapist visits during the meal to discuss resident health issues were discouraged (RCC)
16. Team members physically assisted more than 2 residents at the same time (TF)
17. A spoon was typically used to wipe residents' mouths when providing eating assistance (TF)
18. Residents were assisted by the same team member for an entire meal (RCC)
19. Residents who needed assistance were told what they are eating (RCC)
20. Residents were discouraged from holding a glass or spoon when they were being assisted to eat (TF)
21. Team members did not eat or drink at the table with residents (TF)
22. Residents were not required to eat if they were not hungry (RCC)
23. Family/friends were encouraged to participate in mealtimes with residents (RCC)
24. Residents were encouraged to leave the dining room as soon as they had finished eating (TF)
25. General clean up of the dining room (e.g. removing table cloths and all dishes) was done after most residents had left (RCC)
26. The dining room was available outside of meals for residents, visitors or other programs (RCC)
